# **Plant Chimeras: the good, the bad, and the ‘Bizzaria’**

Margaret H. Frank<sup>1,#</sup> and Daniel H. Chitwood<sup>1</sup>

<sup>1</sup>Donald Danforth Plant Science Center  
975 North Warson Rd, Saint Louis, MO 63132

<sup>#</sup>To whom correspondence should be addressed

Margaret H. Frank  
Donald Danforth Plant Science Center  
975 North Warson Rd.  
Saint Louis, MO 63132  
Phone: (314) 587-1656  
Email: [mfrank@danforthcenter.org](mailto:mfrank@danforthcenter.org)

# 1 *Abstract*

2 Chimeras – organisms that are composed of cells of more than one genotype –  
3 captured the human imagination long before they were formally described and used  
4 in the laboratory. These organisms owe their namesake to a fire-breathing monster  
5 from Greek mythology that has the head of a lion, the body of a goat, and the tail of a  
6 serpent. The first description of a non-fictional chimera dates back to the middle of  
7 the seventeenth century when the Florentine gardener Pietro Nati discovered an  
8 adventitious shoot growing from the graft junction between sour orange (*Citrus*  
9 *aurantium*) and citron (*C. medica*). This perplexing chimera that grows with sectors  
10 phenotypically resembling each of the citrus progenitors inspired discussion and  
11 wonder from the scientific community and was fittingly named the ‘Bizzaria’.  
12 Initially, the ‘Bizzaria’ was believed to be an asexual hybrid that formed from a  
13 cellular fusion between the grafted parents; however, in-depth cellular analyses  
14 carried out centuries later demonstrated that the ‘Bizzaria’, along with other  
15 chimeras, owe their unique sectorized appearance to a conglomeration of cells from  
16 the two donors. Since this pivotal discovery at the turn of the twentieth century,  
17 chimeras have served both as tools and as unique biological phenomena that have  
18 contributed to our understanding of plant development at the cellular, tissue, and  
19 organismal level. Rapid advancements in genome sequencing technologies have  
20 enabled the establishment of new model species with novel morphological and  
21 developmental features that enable the generation of chimeric organisms. In this  
22 review, we show that genetic mosaic and chimera studies provide a technologically  
23 simple way to delve into the organismal, genetic, and genomic inner workings  
24 underlying the development of diverse model organisms. Moreover, we discuss the  
25 unique opportunity that chimeras present to explore universal principles governing  
26 intercellular communication and the coordination of organismal biology in a  
27 heterogenomic landscape.

# 29 *Introduction*

30 Chimeric and mosaic analyses were employed long before the advent of molecular  
31 genetics to explore the fundamental principles that guide organismal growth and

development. The rapid release of new model organisms that have yet to be characterized at their most basic level and the advancement of molecular techniques that enable the dissection of heterogenomic interactions begs for a re-emergence of these classic tools and a re-visitation to explore the molecular coordination that underlies plant development using chimeric and mosaic approaches. We start this review by defining heterogenomicity; we then review the historical context of the chimera concept, describe experimental approaches for obtaining chimeras and mosaics, and finally discuss the future of how chimeric and mosaic studies can transform our view of organismal biology.

## *Definitions*

The term “heterogenomic” refers to organisms that contain heterogeneous genomes. Heterogenomic can be used to describe hybrids and allopolyploids in which independent genomes are housed within a single nucleus, as well as chimeras, genetic mosaics, and the heterokaryotic condition, in which heterogeneous genomes are housed in separate nuclei. Here, we focus on the latter case of heterogenomicity, and specifically discuss two types of heterogenomic organisms: (1) chimeras, which are formed from a conglomeration cells that originated from separate zygotes, and (2) genetic mosaics, which initiate from a single zygote and are subsequently induced or mutated into a heterogenomic state (Rossant and Spence, 1998). Grafted plants, which are formed through the physical joining of separate plant parts, are another class of heterogenomic organism that we do not discuss in this review due to the recent publication of several other reviews on this topic (we refer the reader to: Mudge et al., 2009; Goldschmidt, 2014; Albacete et al., 2015; Melnyk and Myerowitz, 2015; and Warschefsky et al., 2016).

## *A brief history*

Chimeras have intrigued and perplexed the scientific community for centuries. Originally recognized as “sports” (phenotypically distinct branches that arise during vegetative propagation), descriptions of chimeras first appeared in the horticultural literature in 1674, when the Florentine gardener Pietro Nati discovered the

'Bizzaria' growing from the graft junction of *Citrus aurantium* and *C. medica* (**Fig 1A-B**; Tilney-Bassett, 1991; Pietro Nati, 1674). The repeated emergence of unusual sports growing out of graft-junctions from various species combinations piqued the interest of the scientific community and generated extensive speculation about the nature of genetic inheritance and plant hybridization. In his book on "The Variation of Plants and Animals Under Domestication" Darwin proposed the theory of "graft-hybrids" wherein rootstock and scion donors can fuse at the graft-junction site to asexually generate a new hybrid (**Fig 1C**; Darwin, 1868).

The graft-hybrid theory was later refuted and replaced by the graft-chimera hypothesis following two foundational observations at the beginning of the twentieth century (**Fig 1D**; Tilney-Bassett, 1991). First, Winkler (1907) experimentally generated sports at the graft junction between two nightshade species, *Solanum nigrum* and *S. lycopersicum*, in an effort to recapitulate Nati's discovery and dissect the organismal basis of grafting-induced sports. While the majority of the buds resembled one parent or the other, there was one exceptional sport that grew as a longitudinal transect of the two parents, clearly indicating it originated as a conglomeration, rather than a fusion, of cells from the two species. Inspired by the fire breathing Greek monster composed of a lion's head, a goat's body, and a serpent's tail, Winkler adopted the term "Chimera" to describe his morphological anomaly. Winkler (1909) also isolated several shoots that grew as phenotypic intermediates between the two parents, which he assumed were the products of cellular fusion between the progenitor species, and thus proposed that both graft-hybrids and graft-chimeras can be generated at the rootstock-scion junction. Congruent with Winkler's work, Baur (1909) performed a series of independent experiments tracking chlorophyll inheritance in variegated geraniums, which lead him to propose a model in which mature tissues within the shoot can be traced back to clonally distinct layers from the shoot apical meristem (SAM). Following Baur's hypothesis, virtually every sport, including Winkler's phenotypic intermediates, could be described as a heterogeneous arrangement of cells within the SAM, negating further, serious consideration of the graft-hybrid concept.



A century later, the graft-hybrid hypothesis was re-invigorated; experiments tracking the cellular dynamics of fluorescently marked rootstock-scion combinations demonstrated that cellular and nuclear fusion does occur in rare instances at the graft junction, and can actually serve as a route for the asexual generation of allopolyploids (Stegemann and Bock, 2009; Stegemann et al., 2012; Thyssen et al., 2012; Fuentes et al., 2014). While the vast majority of grafting-induced sports are chimeras, this re-emergence of the graft-hybrid concept is a testament to the transformational power that modern techniques can have when they are applied to classical questions. It is in this light that we open our review, reopening an old topic for modern dissection.

#### *Classification of Chimeras and Genetic Mosaics*

Chimeras and genetic mosaics can be classified by the arrangement of their genetically distinct cell types as well as the nature of their origin. Markers that allow for genotypically distinct cells to be distinguished from one another have made chimeras and genetic mosaics extraordinarily useful for performing cell lineage analyses, in which an individual cell and its descendants be tracked from a surrounding population of unmarked cells, and for teasing apart cell autonomous gene functions (in which a cellular trait is influenced by the genotype of that cell) from non-cell autonomous gene functions (in which a cellular trait is influenced by the genotype of other cells). Originally, these markers consisted of differences in the presence or absence of pigmentation (e.g. – anthocyanin or chlorophyll) or less commonly, cytological features such as genome ploidy or chromosomal rearrangements (Brumfield, 1943). Due to these limitations, the vast majority of cell lineage studies were initially restricted to chlorophyll-rich shoot systems.

Before delving into chimera classification it is necessary to give a brief overview of the structure of the shoot apical meristem (SAM). The architecture of the SAM has changed during the evolution of the land plants (Steeves and Sussex, 1989). The SAMs of bryophytes (liverworts, mosses, and hornworts) and seedless vascular

plants (ferns and lycophytes) typically contain a single, conspicuous initial cell or in certain lineages (*Lycopodium* and *Isoetes*), plural, inconspicuous initials. Most seed plants have tunica-corpora SAMs that are organized into clonally distinct cell layers with outer “tunica” layers dividing anticlinally and an inner “corpus” layer that divides both anticlinally and periclinally (Schmidt, 1924; Satina et al., 1940). Gymnosperms typically have a single tunica layer, while most angiosperms have two layers (Popham, 1951). These clonally distinct cell layers contribute to separate tissues within the newly formed lateral organs that are produced along the flanks of the SAM. In leaves of most, but not all angiosperms, the outer meristem layer (L1) forms the colorless epidermal cover, the second meristem layer (L2) forms the sub-epidermal palisade mesophyll and abaxial spongy mesophyll tissue, and the inner corpus (L3) forms the deep mesophyll and vascular tissue (reviewed in Tilney-Bassett, 1991). Thus, plants that are composed of heterogeneous cells in the SAM can be categorized based on the genetic composition of their shoot meristem layers: (1) periclinal chimeras that have a uniform, genetically distinct layer of cells in the shoot apical meristem (SAM) (**Fig 2A**), (2) mericlinal chimeras have a heterogenomic population of cells within a single layer of the SAM (**Fig 2B**), and sectorial chimeras that either have a heterogenomic population of cells traversing multiple SAM layers (**Fig 2C**) or have non-patterned heterogenomic patches of cells (**Fig 2D**). There is a vast array of techniques that are available for producing periclinal, mericlinal, and sectorial chimeras. Some methods are extremely accessible and have been employed for centuries, while others involve advanced transgenic techniques (**Table 1**). The remainder of this review not only highlights methods for creating chimeras and genetic mosaics, but also discusses the biology of these unique organisms, how they have shaped modern plant development, and their potential to transform future applications when combined with new technologies.

### *Interspecies chimeras*

The fact that fully-functioning, reproductive organisms can form out of a conglomeration of cells from species that have diverged over millions of years is a

testament to the remarkable flexibility of plant development. These fantastic interspecies chimeras can be used to determine which cell layers control overall plant architecture (Kaddoura and Mantell, 1991), distinguish cell autonomous from non-cell autonomous developmental programs (Zhou et al., 2002), screen for the movement of molecular information between cell layers, and challenge the coordination of growth and development between divergent species within a single organism (Jørgensen and Crane, 1927; Marcotrigiano, 2010). Interspecies chimeras are generated by mixing cells from separate species together into a single callus culture. Heterogenomic callus is commonly formed by grafting two species together and subsequently inducing bud formation at the graft-junction (generating a graft-chimera) (Winkler, 1907; Chen et al., 2006) or by co-culturing the two species, using a modified tissue culture protocol (Murashige and Skoog, 1962; Marcotrigiano, 1984). A small percentage of the shoot meristems that emerge from these calli are composed of cells from both species. Both mericlinal and periclinal chimeras can arise from this technique and the nature of the chimera depends on the organization of the SAM. This method was inadvertently used to produce the ‘Bizzaria’, and was later employed by Winkler (1907) as a tool to provide the first experimental evidence for the cellular basis of the chimera concept (Tilney-Bassett, 1991).

The generation of interspecies chimeras is a largely underappreciated, yet powerful tool that can be used to tease apart intercellular coordination during development. For example, Zhou et al. (2002) were able to distinguish cell autonomous from non-cell autonomously specified morphological, metabolic, and size features using periclinal chimeras between *Citrus sinensis* and *C. natsudaidai*. Their work revealed that epicarp and juice sac coloration is a cell autonomous trait, whereas epidermal patterning, metabolic features, and organ size are all products of inter-tissue communication (Zhou et al., 2002). The generation of periclinal chimeras between the simple- and complex-leaved species *Solanum luteum* (S) and *S. lycopersicum* (C) (respectively) played an important role in demonstrating tissue-layer coordination during leaf development (reviewed in Szymkowiak and Sussex, 1996). Leaves formed from the CSS periclinal arrangement developed simple leaves, whereas

those formed from the SCC arrangement produced complex leaves (Jørgensen and Crane, 1927), indicating that the sub-epidermal cell layers largely control leaf complexity. Intriguingly, the complex leaves formed from the SCC chimeric organization developed fewer leaflets than uniform CCC plants, implying that while the L1 does not determine simple versus complex leaf formation, it can modulate the degree of complexity (Jørgensen and Crane, 1927). More recently, Marcotrigiano (2010) tested the influence of cell division and expansion on overall organ size by generating periclinal and mericlinal chimeras between the big- and small-leaved species, *Nicotiana tabacum* (B) and *N. glauca* (S) (respectively). Leaf lamina formed from the BSS genotype were big in size, whereas lamina formed from the SBB genotype were small in size, indicating that the epidermal cell layer largely controls overall organ size in leaves. This study also demonstrated that epidermal genotype can influence cell division rates in the mesophyll layer - more cells were formed in the mesophyll cell layer of BSS than SSS plants at developmentally equivalent time points. Moreover, the study showed that cell-to-cell regulation of organ size and mesophyll division rate occurs between but not within cell layers - as leaves that were genotypically split along the margin (SBB/BBB or BSS/SSS) lacked coordination for organ size and cell number between the two halves of the leaf.

#### *Beneficial heterospecies combinations*

The utility of interspecies mosaics extends to the field, where periclinal chimeras between wild and domesticated genotypes serve as a means to physically combine beneficial adaptations from wild species with the edible or otherwise useful products of domestication. One particularly successful implementation of this strategy is in cassava, where the combination of the wild species *Manihot fortalezensis* with the cultivated species *M. esculenta* has been shown to boost edible root size by a factor of seven-fold (Nassar and Bomfim, 2013). A similar approach to plant improvement has been demonstrated for tomato where the epidermis of the wild tomato species *S. pennellii* is sufficient to confer aphid resistance to a domesticated inner core (Goffreda et al., 1990).

Once restricted to phenotypic observations, the molecular signaling that underlies the coordinated growth and development between interspecies tissue layers can now be examined with high-throughput sequencing techniques. For example, the *S. pennellii* (L1) – *S. lycopersicum* (L2/L3) chimera that confers aphid resistance was later used as a tool to profile for cell layer-specific gene expression in the shoot apex (Filippis et al., 2013). Taking advantage of single nucleotide polymorphisms (SNPs) that differentiate *S. lycopersicum* from *S. pennellii* coding sequences, Filippis et al. (2013) used bioinformatic tools to construct a map of L1-derived versus L2/L3-derived transcripts from RNA-sequence profiles of whole SAMs. This study represents one of the many ways in which clonally marked cells can be used to extract cell type-specific molecular information without having to physically sample at the sub-organ level. This method assumes that transcripts generally behave in a cell-autonomous manner; however, recent work indicates that long-distance RNA movement may be pervasive in the plant world (Thieme et al., 2015; Kim et al., 2014). While there are specific cases of cell-to-cell RNA movement (Benkovics and Timmermans, 2014; Chitwood et al., 2009; Carlsbecker et al., 2010; Knauer et al., 2013), the extent to which these “mobile molecular maps” operate on the inter-tissue (i.e. tissue-level) scale and whether or not mobile transcripts contain a “zip code” that specifies targeted delivery (Haywood et al., 2005), or are passively transported as a function of transcript abundance (Calderwood et al., 2016) remains poorly understood. One promising tool for teasing apart intercellular molecular movement would be to generate interspecies chimeras between fluorescently labeled individuals and subsequently screen for the exchange of molecular information between tissue layers using fluorescent associated cell sorting (FACS) in combination with transcriptomic and proteomic profiling. Such an approach would reveal, on a genome-wide level, the mass exchange of molecular information underlying the coordination of plant development, which is typically hidden in non-chimeric plants.

#### *Probability maps*

Induced-sectoring (clonal analyses) with ionizing radiation (such as X-rays, gamma-rays, or fast neutron sources) or active transposon lines (such as Mutator and Activator-Dissociator systems) (Becraft, 2013) can be used to generate all three classes of genetic mosaics (**Fig 2**), and provides a technologically simple method for cell lineage and genetic mosaic analyses. This technique relies on the disruption of a marker gene within an otherwise homogeneous population of cells, producing marked cell lineages that can be visually distinguished from un-mutated cells, and tracked through developmental time. Genes in pigmentation pathways are typically targeted for induced-sectoring; however, radiation-induced cytological sectors have also played an important role in distinguishing cell populations in un-pigmented organs such as roots (Brumfield, 1943). The power to track a cell and its descendants over developmental time has been instrumental in shaping our fundamental understanding of the processes that guide both plant and animal development.

In contrast to animal cells where cell fate is acquired relatively early in development, plant cells tend to be highly plastic and capable of changing their developmental trajectory during late stages of differentiation (Hernandez et al., 1999; Szymkowiak and Sussex, 1996; Poethig, 1997; 1989; Irish, 1991; Dawe and Freeling, 1991). This paradigm is supported by observations of cellular invasions, in which marked cells from one tissue layer will invade and subsequently adopt the cellular identity of adjacent cells (Dermen, 1948; 1949). For example, a cell from the L1 layer of the SAM may invade the L2; this migrant along with its descendants will mature into mesophyll rather than epidermal tissue. The labile-nature of plant cell fate lead Irish and Sussex (1992) to suggest using the term “probability” rather than “fate” mapping, as position rather than lineage plays a larger role in determining the identity of a plant cell. The difference between “fate” versus “probability” mapping marks a conceptual rather than an experimental separation between plant and animal cell lineage analyses; the use of the word “probability” acknowledges that even late in their development, plant cells may take on a different cell fate depending on the context of their cellular neighborhood.

Cell lineage mapping has provided the foundation upon which all further research into the dynamics of organogenesis during plant development has been built. Cell-lineage studies carried out during the embryonic stages of development demonstrate that the entire aerial portion of the angiosperm body is derived from just a few initials (Steffensen, 1968; McDaniel and Poethig, 1988; Jegla and Sussex, 1989; Irish and Sussex, 1992; Furner and Pumfrey, 1992; Bossinger et al., 1992; Saulsberry et al., 2002), whereas analyses at later developmental stages indicate that there is considerable variation in founder cell number during determinate organ recruitment. While hundreds of cells are recruited during leaf initiation (Poethig, 1997; Stein and Steffensen, 1959; Poethig and Sussex, 1985; Poethig and Szymkowiak, 1995; Dolan and Poethig, 1998a), as few as two initials are involved in leaflet initiation (Barkoulas et al., 2008).

Newly sequenced model species with unique morphologies have inspired a revival in the use of probability mapping. Studies in ancestral lineages of the land plant phylogenetic tree show that these anciently derived species differ dramatically from angiosperms in their developmental strategies. For instance, in contrast to the hundreds of cells that are involved in angiosperm leaf recruitment, leaf-like organogenesis in the model moss, *Physcomitrella patens*, is largely orchestrated through the asymmetric divisions of a single-celled SAM (Harrison et al., 2009). Likewise, leaves in the seedless vascular plants, *Nephrolepis exaltata* and *Selaginella kraussiana*, are derived from just one or two cells (respectively) situated along the epidermal flanks of a multicellular SAM (Harrison et al., 2007; Sanders et al., 2011). Cell-lineage mapping has also enabled quantitative explorations of novel structures in model angiosperms. The Coen lab, for instance, has combined clonal sector analyses with computational modeling, and developmental genetics, to investigate pattern formation in morphologically complex *Antirrhinum* flowers (Vincent, et al., 1995; Rolland-Lagan et al., 2003; Green et al., 2010). An extension of this strategy to diverse model systems will play a useful role in deducing the rules that underlie the formation of novel organ morphologies.



# *Genetic mosaics*

Induced sector analyses have also been used to investigate mutants in a tissue- and organ-specific fashion. These studies rely on the physical linkage of a marker gene with a mutant locus of interest. Heterozygous individuals are treated to produce chromosomal breakage and/or loss, unmasking hemizygous (loci that exist in a single copy state because they lack an allelic complement on the sister chromosome) mutant and wild-type sectors that can be tracked in a cell- and tissue-specific manner by observing the presence or absence of the marker (Dawe and Freeling, 1991). Genetic mosaic analyses of classical developmental mutants from maize, tobacco, and cotton have been used to decipher when and where a gene functions without any pre-requisite knowledge of the gene sequence. Barbara McClintock (1932) was among the first to experimentally demonstrate this phenomenon when she was investigating the correlation between variegated cell lineages and the somatic elimination of ring-shaped chromosomes in maize. McClintock's initial observation has been greatly expanded upon and refined into a tool that can be used to track mutant alleles in a cell-lineage specific fashion. In a pioneering example of this technique, Johri and Coe (1983) used X-rays to unmask mutant sectors of the classic maize inflorescence mutants – *ramosa-1*, *tunicate*, *tassel-seed*, and *vestigial* - to demonstrate that in all cases these genetic factors function in a cell autonomous fashion to control tassel differentiation late in development. Since this early study, induced sectoring has proven to be particularly effective for studying the post-embryonic effects of embryo lethal mutants (Candela et al., 2011; Fu and Scanlon, 2004; Becraft et al., 2002; Neuffer, 1995), separating cell autonomous from non-cell autonomous gene functions (Hake and Freeling, 1986; Hake and Sinha, 1993; Sinha and Hake, 1990; McDaniel and Poethig, 1988; Scanlon and Freeling, 1997; Becraft et al., 1990; Becraft and Freeling, 1991; Becraft et al., 2002; Scanlon, 2000; Furner et al., 1996; Dolan and Poethig, 1998b; Dudley and Poethig, 1993; Dudley and Poethig, 1991; Foster et al., 1999; Szymkowiak and Irish, 1999), and comparing adjacent mutant and wild-type cell types within a single developmental stage (reviewed in Neuffer, 1995). The success of induced sector



analysis relies heavily on the selection of appropriate marker genes and the mutagenesis strategy (the following reviews cover in-depth discussions concerning these parameters: Hake and Sinha, 1994; Neuffer, 1995; Becraft, 2013). The optimization of these parameters can be circumvented using an inducible transgenic mosaic system (discussed below).

### *Transgenic marker systems*

In recent years, elegant transgenic systems have greatly extended cell lineage and genetic mosaic analyses to virtually every tissue type during the plant life cycle (Sieburth et al., 1998; Kidner et al., 2000; Sessions et al., 2000; Jenik and Irish, 2001). While there are a wide variety of engineered combinations they all generally consist of an inducible marker whose expression can be stochastically “flipped” (turned on through the excision of an interrupting sequence or turned off through excision of the marker itself) (**Fig 3A**).

Typically, beta-glucuronidase (GUS) or a fluorescent protein is used as the marker and the Cre-Lox recombinase or the Activator/Dissociator (Ac/Ds) transposon system is used to flip marker gene expression. Jenik and Irish (2001) constructed an adaptation to this transgenic reporter strategy, using the Activator Dissociator (Ac/Ds) transposon system, to generate genetic mosaics of the petal and stamen homeotic mutant, *apetala3* (*ap3*). They introduced a complementation construct into an *ap3* mutant background in which a wildtype copy of *AP3* constitutively driven by 35S was bordered by Ds sequences and followed by a promoterless *GUS* reporter. Constitutively expressed Ac driven under a 35S promoter lead to the stochastic excision of the Ds bordered *AP3* gene, generating mutant sectors that were marked by the recovery of *GUS* expression. This study revealed that *AP3* functions in both the cell autonomous patterning of epidermal cells and non-cell autonomous coordination of organ shape, and demonstrated the efficacy of transgenic mosaic systems for observing cell lineages in organs that lack chlorophyll markers.

Several powerful adaptations of transgenic mosaic methods have been designed for animal systems. G-TRACE combines a Gal4-enhancer trap with Gal4-dependent fluorescent reporters, allowing for the simultaneous and real-time examination of gene expression and cell lineage patterns within any *Drosophila* tissue (Evans et al.,

2009). “Brainbow” is another system that relies on the stochastic flipping of multiple fluorescent proteins, creating combinatoric fluorescent outputs that can be used to distinguish the individual cells in a wide variety of animal cell systems (Weissman and Pan, 2015). Brainbow was originally invented to track individual neurons in the mouse brain (Weissman et al., 2011), and has since been extended to a wide variety of cell-type specific animal systems, including imaginal wing discs in *drosophila* (“Flybow”; Hadjieconomou et al., 2011) and skin cells in zebra fish (“Skinbow”; Chen et al., 2016). It is easy to imagine how similar tools for model plants could greatly enhance our examination of complex developmental questions, such as position-dependent cell differentiation. For example, the G-TRACE system could be used to tease apart the interplay between gene expression dynamics and the acquisition of position-dependent cell fate. Here, we propose a “Plantbow” system that would enable high resolution *in vivo* tracking of cell lineages, which could ultimately improve our understanding of how complex morphological structures are formed in new model species (**Fig 3B**).

CRISPR-Cas gene targeting, which allows for specific sequences within the genome to be edited (Bortesi and Fischer, 2015), offers a new mechanism for generating sequence-specific genetic mosaics. CRISPR technology relies on the co-expression of a guide RNA that targets the genomic region of interest and a Cas endonuclease that edits the targeted DNA. Levy et al. (2015, personal communication) discovered that crossing Cas and guide RNA expressing plants together results in F1 targeted editing mosaics (**Fig 3C**). While this advanced genetic mosaic system has yet to be widely utilized, it offers a promising approach to finely dissect gene function on the nucleotide site-specific level.

### *Cytochimeras*

Cytochimeras are mosaics that differ in their cytological features (typically nuclear size), can be synthesized through induced-polyploidization with colchicine treatment (Dermen, 1940). While photosynthetic markers allow for efficient lineage tracking at the organ level, cytochimeras provide a high-resolution method of

tracking individual cells at a histological level. This technique is rarely used today, due to the labor-intensive methodology required to examine these mosaics; however, the knowledge garnered from these classic studies still functions as the cornerstone upon which all other investigations of the shoot apex are built. The demonstration that the SAM is organized into clonally distinct cell layers, and subsequent tracking of these layers into tissue positions within mature organs, is based upon impressive, histological dissection of cytochimeras (Satina et al., 1940; Dermen, 1947, 1953; Satina and Blakeslee, 1941, 1943; Baker, 1943; Satina, 1944; Stewart and Burk, 1970; Stewart and Dermen, 1970, 1975). Moreover, the realization that plant cells lack fixed developmental fates was unequivocally observed in periclinal cytochimeras, in which layer invasions could be tracked all the way from their origin in the SAM into mature organ tissues (Poethig, 1987; Dermen, 1953). In contrast to the extensive cytochimeric analyses that have been carried out in angiosperms, there is little to no information concerning the clonal organization of cells within seedless vascular plant meristems (Kawakami et al., 2007). The distinct apical-cell type SAM organization of species found within these early land plant lineages makes them prime candidates for cytochimeric tests of simple hypotheses concerning the functional relevance of the conspicuous apical cell (Steeves and Sussex, 1989).

### *Somatic ejection*

The stochastic loss or change of unstable genetic material during mitosis can also lead to the formation of chimeras. Genetic instability occurs quite frequently in plants that have unstable chromosomes (such as ring chromosomes), transgenic plants with altered CENH3 coding sequences (Ravi and Chan, 2010), chromosomes that are prone to somatic recombination (reviewed in Dawe and Freeling, 1991), or in mutants that distort nuclear dynamics during mitosis (Turcotte and Feaster, 1963). The *semigamy* mutant in cotton offers a particularly useful system for tracing cell lineages based on the random ejection of genetic material. *Semigamy* egg cells are defective in paternal-maternal nuclear fusion during fertilization. Crossing a genotype of interest onto *Semigamy* gives rise to double haploid offspring that

stochastically lose either of the parental nuclei, creating genetic mosaics between the paternal and maternal genomes (Turcotte and Feaster, 1963; 1967). Dolan and Poethig (1991 and 1998a,b) leveraged this elegant genetic setup to perform classic cell lineage analyses in cotton and investigate the tissue-specific functions of the dominant, complex leaf mutant *Okra*. Their analyses showed that genetic mosaics with the *Okra* mutation in any of the three SAM layers could lead to partial expression of the *Okra* mutant phenotype, demonstrating that the compound leaf phenotype is a product of *Okra* function in all three layers of the shoot apex (Dolan and Poethig, 1998b).

### *Sporting*

Waiting for a chance mutation is undoubtedly the easiest way to obtain a genetic mosaic. Somatic mutation rates vary considerably at the species level; however, Lynch et al. (2010) were able to use data from Arabidopsis mutation accumulation lines (Ossowski et al., 2010) and the estimation that each generation is separated by 40 cell divisions (Hoffman et al., 2004) to calculate that approximately  $1.6 \times 10^{-10}$  mutations occur per base per cell division. According to these estimates, one mutation occurs approximately every six cell divisions; meaning that the average Arabidopsis plant is composed of a heterogenomic population of cells and is in essence a genetic mosaic long before it germinates (Ossowski et al., 2010; Lynch, 2010). The majority of these mutations occur in non-coding regions of the genome (approximately 75% of the Arabidopsis genome consists of non-coding sequence; Bevan et al., 2001), or occur in cells that are close to differentiation, thus having little to no obvious affect on plant phenotype. However, rare somatic events can create drastic organismal changes. These serendipitous mutations that occur in meristematic cells give rise to “bud-sports”, which are defined as somatic events that produce morphological shifts during vegetative development.

“Sporting” is the innovative force behind the isolation of new grape varieties (Skene and Barlass, 1983), the cultivation of thornless blackberries (Darrow, 1931; McPheeters and Skirvin, 1983), and the tremendous diversity of variegated cultivars

that populate horticultural nurseries (covered in Tilney-Bassett, 1991). While most horticultural sports have yet to be traced to their molecular origins, the viticulture community has been particularly successful in identifying the mutational basis of economically important somatic events. For example, the *Vitis vinifera* variety Pinot Meunier, which happens to be one of only three grape varieties predominately used for Champagne production, arose spontaneously from a Pinot Noir shoot. Subsequent tissue culture isolation of L1 and L2 layers from Pinot Meunier revealed that this new variety was generated through a dominant negative mutation in a DELLA repressor within the L1 layer of the SAM (Boss and Thomas, 2002). Regeneration from just the L1 layer gave rise to yet another variety called “Pixie” (Cousins, 2007). Pixie is a dwarfed version of Pinot Meunier that bears inflorescences in place of tendrils and flowers earlier than its chimeric counterpart, making it an ideal new model system for carrying out genetic studies in grape (Boss and Thomas, 2002). Berry color is another highly dissected trait that sports quite frequently during grape propagation. Extensive work on the genetic and genomic underpinnings of berry color have shown that nearly all Pinot berry variants can be mapped back to a single locus consisting of four tandem MYB transcription factors on chromosome 2, aptly named the “berry color locus” (Migliaro and Crespan, 2014; Walker et al., 2006; 2007; This et al., 2007; Vezzulli et al., 2012; Azuma et al., 2011; Fournier-Level et al., 2010; Furiya et al., 2009; Kobayashi et al., 2004; Yakushiji et al., 2006). Somatic mutations within the berry color locus are frequently maintained within a single layer of the SAM; thus, berry pigmentation is an integrated output of both the allelic nature of the locus and the SAM layer in which the allele is expressed (Walker et al., 2006; Hocquigny et al., 2004; Shimazaki et al., 2011).

#### *Variegation in the garden*

Variegated mosaics, which are defined as plants with pigmentation patterning due to SAM layer-specific mutations, provide another horticulturally abundant example of sporting. Striking leaf and flower color variants are inescapable in modern landscaping. These plants have two main genetic origins; they are either periclinal mosaics that arose through a stable meristem-layer specific mutation in a crucial

component of a pigmentation biosynthesis pathway (**Fig 4A-D**) or they are non-patterned sectorial mosaics with highly active transposons that hop in and out of pigmentation biosynthesis genes creating random sectors (**Fig 4E-G**; Tilney-Bassett, 1986). Beyond beautifying the garden, variegated plants have played an instrumental role in the establishment of the chimera concept. Baur's (1909) investigation of leaves in variegated geraniums lead to a model in which clonally distinct layers of the SAM contribute to independent cellular regions within the differentiated leaf. In leaves, the L1 forms the unpigmented epidermal layer, the L2 forms the upper and lower mesophyll and is particularly pronounced along the margins of the leaf, and the L3 forms the core mesophyll and vascular tissue and is visible in the center of the leaf (**Fig 2A**; **Fig 4A**). This clear and consistent visual readout of SAM organization makes it easy to observe cellular invasions within the SAM. For example, a mosaic with a green L2 and white L3 that produces leaves with a green margin and white center (**Fig 4B**) may sport into an albino shoot if the L3 invades the L2 (**Fig 4C**), or recover into an entirely green shoot if the L2 invades the L3 (**Fig 4D**). Often times, these SAM layer transitions occur in stages where one or two meristem initials are replaced by a neighboring layer, giving rise to intermediate mericlinal mosaics in which half or a quarter of the variegated plant sports into a new pattern of variegation (**Fig 4H-J**). A century of continued exploration following Baur's initial proposal has shown that predictable pigmentation patterns can be mapped for virtually any species and any organ-type, making these botanical puzzles incredibly useful for investigating cell lineages and SAM dynamics in non-model species.

### *Microchimerism*

Mutations that spawn-striking shifts in plant phenotype are widely appreciated as important drivers of evolutionary change and agronomic advancement; in contrast, the collective impact of small effect somatic mutations remains poorly understood. In annuals, these events may have little to no impact on the life cycle of the plant. However, *very* long-lived organisms that collect somatic mutations for thousands of years such as the Bristle Cone Pine and the Llangernyw Yew (Sussman and Zimmer,

2014), or long-lived clonal lineages such as the creosote bush and box huckleberry, present intriguing systems for investigating the beneficial versus detrimental tradeoffs of somatic events. Evidence for the beneficial impact of somatic mutations comes from evolutionary modeling of plant-herbivore interactions between long-lived trees and rapid-cycling herbivores, which indicates that somatic mutations provide a viable mechanism for slow-cycling plants to evolve and defend against their attackers (Folse and Roughgarden, 2012; Whitham and Slobodchikoff, 1981). Next-generation sequencing technologies that allow for deep genomic profiling of isolated cell populations have proven to be hugely successful in advancing our understanding of somatic mosaicism and its relation to human diseases (Pagnamenta et al., 2012; Yamaguchi et al., 2015). Now, a similar approach has been applied to long-lived plants, providing experimental support for the theoretical model of uni-generational evolution. Transcriptomic profiling of mosaic sectors within Eucalyptus individuals demonstrates that herbivore resistant patches are marked by massive transcriptomic remodeling that is associated with enhanced plant defense (Padovan et al., 2013; Padovan et al., 2015). As yet, it is unclear whether this dramatic molecular reprogramming is the result of genetic mutations or epigenetic modifications that have accumulated amongst the mosaic branches of Eucalyptus. Most mutations are deleterious, and the long-term impact of mutational load on a slow cycling organism is more likely to lead to a “mutational meltdown” than an advantageous adaptation. Indeed, live cell imaging and surgical manipulations of axillary meristem precursors in Arabidopsis and tomato indicates that both the position and highly reduced cell division rates of these stem cell niche precursors potentially safeguard long-lived plants from mutational meltdown (Burian et al., 2016). These findings mark the tip of the iceberg in our investigation of uni-generational evolution, and raise important questions concerning the prevalence of heterogenomicity and its role in slow-cycling organismal adaptation.

# *Concluding remarks*

Organisms are generally assumed to function as genetically uniform individuals, but there are an overwhelming number of examples that break this assumption. Rather



than being a rare phenomenon, estimations of somatic mutation rates indicate that the vast majority of multicellular organisms are by definition mosaics, and genomic uniformity is the exception rather than the norm. In an era where an organism's genome is in essence its blueprint, the heterogenomic state forces us to re-examine how we define an individual's genotypic identity and the relationship between genotype and phenotype. The prevalence of heterogenomicity within the plant kingdom has served both as a tool for investigating fundamental questions in developmental biology, as well as a phenomenon that generates new questions. As a tool, chimeric and mosaic analyses have demonstrated the importance of intercellular communication, context-dependent gene function, and cell lineages during tissue and organ formation. However, as a phenomenon, we are left with several open questions concerning the biological basis for heterogenomicity. We have yet to identify the intercellular signals that allow for developmental coordination across heterogenomic tissues. Furthermore, we know very little about what determines heterogenomic compatibility, and what gives rise to beneficial versus detrimental genomic combinations. Advanced molecular techniques that allow for genomic-level analyses, coupled with tissue- and cell-specific profiling, provide obvious means to begin dissecting the mechanisms underlying classic observations of communication within plants at both the organismal and intercellular levels. Chimeras and mosaics always have, and always will be, the principal method to understand intra-organismal communication during development, the cell-autonomous and non-cell autonomous activity of genes, and the consequences of heterogenomicity within an individual.

## Acknowledgements

We are grateful to Dr. Poethig for generously providing an image of the Poinsettia periclinal mosaic series (**Fig 4A**), to Dr. Elzinga and the University of California at Riverside Library for sending us a digital copy of the original 'Bizzaria' publication (**Fig 1A**), and to Dr. Levy for supplying us with an image of his CRISPR-Cas PSY1 genetic mosaic (**Fig 3C**). M.H.F. is supported by a postdoctoral fellowship from the



588 NSF PGRP (award number IOS-1523669).

589

590

## 591 **References**

592 Albacete, A., Martínez-Andújar, C., Martínez-Pérez, A., Thompson, A.J., Dodd, I.C.,  
593 Pérez-Alfocea, F., 2015. Unraveling rootstock x scion interactions to improve food  
594 security. J. Ex. Bot., 32, 928-38. doi:10.1093/jxb/erv027

595

596 Azuma, A., Udo, Y., Sato, A., Mitani, N., Kono, A., Ban, Y., Yakushiji, H., Koshita, Y., and  
597 Kobayashi, S., 2011. Haplotype composition at the color locus is a major genetic  
598 determinant of skin color variation in *Vitis × labruscana* grapes. Theor. Appl.  
599 Genet., 122, 1427–1438. doi:10.1007

600 Baker, R. E., 1943. Induced polyploid, periclinal chimeras in *Solanum tuberosum*. Am.  
601 J. Bot., 30, 187-195. DOI: 10.2307/2437238

602

603 Barkoulas, M., Hay, A., Kougioumoutzi, E., and Tsiantis, M., 2008. A developmental  
604 framework for dissected leaf formation in the Arabidopsis relative *Cardamine*  
605 *hirsuta*. Nat. Genet., 40: 1136-41. doi: 10.1038/ng.189.

606

607 Baur, E., 1909. Das Wesen und die Erblchkeits Verhailtnisse der "Varietates  
608 albomarginatae Hort." von *Pelargonium zonale*. Zeit. Abst. Vererbungslehre., 1,  
609 330-351.

610

611 Becraft, P. W., 2013. Using transposons for genetic mosaic analysis of plant  
612 development. Methods Mol. Biol., 1057, 21–42. doi:10.1007/978-1-62703-568-  
613 2\_3.

614 Becraft, P. W., and Freeling, M., 1991. Sectors of *liguleless-1* tissue interrupt an  
615 inductive signal during maize leaf development. Plant Cell, 3, 801–807.  
616 doi:10.1105/tpc.3.8.801.

- 617 Becraft, P. W., Bongard-Pierce, D. K., Sylvester, A. W., Poethig, R. S., and Freeling, M.,  
618 1990. The *liguleless-1* gene acts tissue specifically in maize leaf development.  
619 Dev. Biol., 141, 220–232.
- 620 Becraft, P. W., Li, K. J., Dey, N., and Asuncion-Crabb, Y., 2002. The maize *dek1* gene  
621 functions in embryonic pattern formation and cell fate specification.  
622 Development, 129, 5217–5225.
- 623 Benkovics, A.H., and Timmermans, M.C.P., 2014. Developmental patterning by  
624 gradients of mobile small RNAs. Curr. Opin. Genet. Dev. 27, 83–91.  
625 doi:10.1016/j.gde.2014.04.004  
626
- 627 Bevan, M., Mayer, K., White, O., Eisen, J.A., Preuss, D., Bureau, T., Salzberg, S.L., and  
628 Mewes, H.W. 2001. Sequence and analysis of the Arabidopsis genome. Curr.  
629 Opin. Plant Biol., 4: 105-110.  
630
- 631 Bortesi, L., and Fischer, R., 2015. The CRISPR/Cas9 system for plant genome editing  
632 and beyond. Biotechnol. Adv., 33, 41-52.  
633
- 634 Boss, P. K., and Thomas, M. R., 2002. Association of dwarfism and floral induction  
635 with a grape “green revolution” mutation. Nature, 416, 847–850.  
636 doi:10.1038/416847a.
- 637 Bossinger, G., Maddaloni, M., and Motto, M., 1992. Formation and cell lineage  
638 patterns of the shoot apex of maize. Plant J., 2, 311-320. doi: 10.1111/j.1365-  
639 313X.1992.00311.x  
640
- 641 Brumfield, R. T., 1943. Cell-lineage studies in root meristems by means of  
642 chromosome rearrangements induced by X-rays. Am. J. Bot., 30, 187-195.
- 643 Burian, A., Barbier de Reuille, P., Kuhlemeier, C., 2016. Patterns of cell divisions  
644 contribute to plant longevity. Curr. Biol., 26, 1-10. doi:10.1016/j.cub.2016.03.067

- Calderwood, A., Kopriva, S., and Morris, R. J., 2016. Transcript abundance explains RNA mobility data in *Arabidopsis thaliana*. *Plant Cell*, 28, 610-15.
- Candela, H., Pérez-Pérez, J. M., and Micol, J. L., 2011. Uncovering the post-embryonic functions of gametophytic- and embryonic-lethal genes. *Trends Plant Sci.*, 16, 336–345. doi:10.1016/j.tplants.2011.02.007.
- Carlsbecker, A., Lee, J.-Y., Roberts, C.J., Dettmer, J., Lehesranta, S., Zhou, J., Lindgren, O., Moreno-Risueno, M.A., Vatén, A., Thitamadee, S., Campilho, A., Sebastian, J., Bowman, J.L., Helariutta, Y., and Benfey, P.N., 2010. Cell signaling by microRNA165/6 directs gene dose-dependent root cell fate. *Nature* 465, 316–321. doi:10.1038/nature08977
- Chen, C.-H., Puliafito, A., Cox, B.D., Primo, L., Fang, Y., Di Talia, S., Poss, K.D. 2016. Multicolor cell barcoding technology for long-term surveillance of epithelial regeneration in zebrafish. *Dev. Cell*, 36: 668-680.
- Chen, L.-P., Ge, Y.-M., Zhu, X.-Y., 2006. Artificial synthesis of interspecies chimeras between tuber mustard (*Brassica juncea*) and cabbage (*Brassica oleracea*) and cytological analysis. *Plant Cell Rep.*, 25, 907-13. DOI 10.1007/s00299-006-0150-5
- Chitwood, D.H., Nogueira, F., Howell, M.D., 2009. Pattern formation via small RNA mobility. *Genes Dev.* 23, 549-54.
- Cousins, P. 2007. Pixie, a dwarf grapevine for teaching and research. <http://iv.ucdavis.edu/files/108789.pdf>
- Darrow, G., 1931. A productive thornless sport of the Evergreen blackberry. *J. Hered.*, 22, 405-406.
- Darwin, C., 1868. *The Variation of Animals and Plants Under Domestication*.

- 674 Dawe, R. K., and Freeling, M., 1991. Cell lineage and its consequences in higher  
675 plants. *Plant J.*, 1, 3-8.
- 676 Dermen, H., 1948. Chimera apple sports and their propagation through adventitious  
677 buds. *J. Hered.*, 39, 235-242.
- 678 Dermen, H., 1940. Colchicine polyploidy and technique. *The Botanical Review*, 6,  
679 599-635.
- 680 Dermen, H., 1947. Periclinal cytochimeras and histogenesis in cranberry. *Am. J. Bot.*,  
681 34, 32-43.
- 682 Dermen, H., 1953. Periclinal cytochimeras and origin of tissues in stem and leaf of  
683 peach. *Am. J. Bot.*, 40, 154-168.
- 684 Dermen, H., 1949. Ploidy in the Hibernian apple and in some *Malus* species. *J. Hered.*,  
685 40, 162-164.
- 686 Dolan, L., and Poethig, R., 1998a. Clonal analysis of leaf development in cotton. *Am. J.*  
687 *Bot.*, 85, 315-321.
- 688 Dolan, L., and Poethig, R., 1998b. The *OKRA* leaf shape mutation in cotton is active in  
689 all cell layers of the leaf. *Am. J. Bot.*, 85, 322-327.
- 690 Dolan, L., and Poethig, R. S., 1991. Genetic analysis of leaf development in cotton.  
691 *Development*, 113, 39-46.
- 692 Dudley, M., and Poethig, R. S., 1991. The effect of a heterochronic mutation, *Teopod2*,  
693 on the cell lineage of the maize shoot. *Development*, 111, 733-739.
- 694 Dudley, M., and Poethig, R. S., 1993. The heterochronic *Teopod1* and *Teopod2*  
695 mutations of maize are expressed non-cell-autonomously. *Genetics*, 133, 389-  
696 399.
- 697 Evans, C. J., Olson, J. M., Ngo, K. T., Kim, E., Lee, N. E., Kuoy, E., Patananan, A. N., Sitz,

698 D., Tran, P., Do, M.-T., Yackle, K., 2009. G-TRACE: rapid Gal4-based cell lineage  
699 analysis in *Drosophila*. *Nat. Methods*, 6, 603–605. doi:10.1038/nmeth.1356.

700 Filippis, I., Lopez-Cobollo, R., Abbott, J., Butcher, S., and Bishop, G.J., 2013. Using a  
701 periclinal chimera to unravel layer-specific gene expression in plants. *Plant J.* 75:  
702 1039-1049.

703 Folsie, H. J., and Roughgarden, J., 2012. Direct benefits of genetic mosaicism and  
704 intraorganismal selection: modeling coevolution between a long-lived tree and a  
705 short-lived herbivore. *Evolution*, 66, 1091–1113. doi:10.1111/j.1558-  
706 5646.2011.01500.x.

707 Foster, T., Veit, B., and Hake, S., 1999. Mosaic analysis of the dominant mutant,  
708 *Gnarley1-R*, reveals distinct lateral and transverse signaling pathways during  
709 maize leaf development. *Development*, 126, 305–313.

710 Fournier-Level, A., Le Cunff, L., Gomez, C., Doligez, A., Ageorges, A., Roux, C.,  
711 Bertrand, Y., Souquet, J.-M., Cheynier, V., and This, P., 2009. Quantitative genetic  
712 bases of anthocyanin variation in grape (*Vitis vinifera* L. ssp. *sativa*) berry: a  
713 quantitative trait locus to quantitative trait nucleotide integrated study.  
714 *Genetics*, 183, 1127–1139. doi:10.1534/genetics.109.103929.

715 Fu, S., and Scanlon, M. J., 2004. Clonal mosaic analysis of EMPTY PERICARP2 reveals  
716 nonredundant functions of the duplicated HEAT SHOCK FACTOR BINDING  
717 PROTEINS during maize shoot development. *Genetics*, 167, 1381–1394.  
718 doi:10.1534/genetics.104.026575.

719 Fuentes, I., Stegemann, S., Golczyk, H., Karcher, D., and Bock, R., 2014. Horizontal  
720 genome transfer as an asexual path to the formation of new species. *Nature*, 511,  
721 232–235. doi:10.1038/nature13291.

722 Furiya, T., Suzuki, S., and Sueta, T., 2009. Molecular characterization of a bud sport of  
723 Pinot gris bearing white berries. *Am. J. Enol. Vitic.*, 60, 66-73.

- 724 Furner, I. J., Ainscough, J. F., Pumfrey, J. A., and Petty, L. M., 1996. Clonal analysis of  
725 the late flowering *fca* mutant of *Arabidopsis thaliana*: cell fate and cell  
726 autonomy. *Development*, 122, 1041–1050.
- 727 Furner, J., and Pumfrey, J. E., 1992. Cell fate in the shoot apical meristem of  
728 *Arabidopsis thaliana*. *Development*, 115, 755-764.
- 729 Green, A.A., Kennaway, J.R., Hanna, A.I., Bangham, J.A., Coen, E., 2010. Genetic control  
730 of organ shape and tissue polarity. *PLoS Biol.*, 8, e1000537.
- 731 Goffreda, J. C., Szymkowiak, E. J., and Sussex, I. M., 1990. Chimeric tomato plants  
732 show that aphid resistance and triacylglycerol production are epidermal  
733 autonomous characters. *Plant cell*, 2, 643-649.
- 734 Goldschmidt, E.E., 2014. Plant grafting: new mechanisms, evolutionary implications.  
735 *Front. Plant Sci.*, 5, 727. doi: 10.3389/fpls.2014.00727  
736  
737
- 738 Hadjieconomou, D., Rotkopf, S., Alexandre, C., Bell, D.M., Dickson, B.J., and Salecker, I.  
739 2011. Flybow: genetic and multicolor cell labeling for neural circuit analysis in  
740 *Drosophila melanogaster*. *Nature Methods*, 8: 260-266.  
741  
742
- 743 Hake, S., and Freeling, M., 1986. Analysis of genetic mosaics shows that the extra  
744 epidermal cell divisions in Knotted mutant maize plants are induced by adjacent  
745 mesophyll cells. *Nature*, 320, 621-623.
- 746 Hake, S., and Sinha, N., 1994. The use of clonal sectors for lineage and mutant  
747 analysis. In: *The maize handbook* (Freeling, M., and Walbot, V., eds). New York:  
748 Springer-Verlag: 262-270.
- 749 Harrison, C. J., Rezvani, M., and Langdale, J. A., 2007. Growth from two transient  
750 apical initials in the meristem of *Selaginella kraussiana*. *Development*, 134, 881–  
751 889. doi:10.1242/dev.001008.
- 752 Harrison, C. J., Roeder, A. H. K., Meyerowitz, E. M., and Langdale, J. A., 2009. Local

753 Cues and Asymmetric Cell Divisions Underpin Body Plan Transitions in the Moss  
754 *Physcomitrella patens*. *Current Biology*, 19, 461–471.  
755 doi:10.1016/j.cub.2009.02.050.

756 Haywood, V., Yu, T-S., Huang, N-C., Lucas, W.J., 2005. Phloem long-distance  
757 trafficking of *GIBBERELLIC ACID-INSENSITIVE* RNA regulates leaf development.  
758 *Plant J.*, 42, 49-68.

759 Hernandez, M.L., Passas, H.J., Smith, L.G., 1999. Clonal analysis of epidermal  
760 patterning during maize leaf development. *Dev. Biol.*, 216, 646-658.

761 Hocquigny, S., Pelsy, F., Dumas, V., Kindt, S., Heloir, M.-C., and Merdinoglu, D., 2004.  
762 Diversification within grapevine cultivars goes through chimeric states. *Genome*,  
763 47, 579–589. doi:10.1139/g04-006.

764 Hoffman, P. D., Leonard, J. M., Lindberg, G. E., Bollman, S. R., Hays, J. B., 2004. Rapid  
765 accumulation of mutations during seed-to-seed propagation of mismatch-  
766 repair-defective Arabidopsis. *Genes Dev.*, 18, 2676-85.

767 Irish, V. F., 1991. Cell lineage in plant development. *Curr. Opin. Cell Biol.*, 3, 983-987.

768 Irish, V. F., and Sussex, I. M., 1992. A fate map of the Arabidopsis embryonic shoot  
769 apical meristem. *Development*, 115, 745–753.

770 Jegla, D. E., and Sussex, I. M., 1989. Cell lineage patterns in the shoot meristem of the  
771 sunflower embryo in the dry seed. *Dev. Biol.* 131, 215-225.

772 Jenik, P. D., and Irish, V. F., 2001. The Arabidopsis floral homeotic gene *APETALA3*  
773 differentially regulates intercellular signaling required for petal and stamen  
774 development. *Development*, 128, 13–23.

775 Johri, M. M., and Coe, Jr. E. H. 1982. Clonal analysis of corn plant development. I. The  
776 development of the tassel and the ear shoot. *Dev. Biol.* 97, 154-172.  
777

- 778 Jørgensen, C. A., and Crane, M. B., 1927. Formation and morphology of *Solanum*  
779 *chimaeras*. *Genetics*, 18, 247-73.
- 780 Kaddoura, R. L., Mantell, S. H. 1991. Synthesis and characterization of *Nicotiana*-  
781 *Solanum* graft chimeras. *Ann. Bot.*, 1991, 547-56.
- 782 Kawakami, S. M., Kato, J., Kawakami, S., and Serizawa, S., 2007. Ploidy chimeras  
783 induced in haploid sporophytes of *Osmunda claytoniana* and *Osmunda japonica*.  
784 *J. Plant Res.*, 120, 641–645. doi:10.1007/s10265-007-0098-8.
- 785 Kidner, C., Sundaresan, V., Roberts, K., and Dolan, L., 2000. Clonal analysis of the  
786 *Arabidopsis* root confirms that position, not lineage, determines cell fate. *Planta*,  
787 211, 191-99.
- 788 Kim, G., LeBlanc, M.L., Wafula, E.K., dePamphilis, C.W., Westwood, J.H., 2014. Plant  
789 science. Genomic-scale exchange of mRNA between a parasitic plant and its  
790 hosts. *Science* 345, 808–811. doi:10.1126/science.1253122  
791
- 792 Knauer, S., Holt, A.L., Rubio-Somoza, I., Tucker, E.J., Hinze, A., Pisch, M., Javelle, M.,  
793 Timmermans, M.C., Tucker, M.R., Laux, T., 2013. A protodermal miR394 signal  
794 defines a region of stem cell competence in the *Arabidopsis* shoot meristem.  
795 *Dev. Cell* 24, 125–132. doi:10.1016/j.devcel.2012.12.009  
796
- 797 Kobayashi, S., Goto-Yamamoto, N., and Hirochika, H., 2004. Retrotransposon-  
798 induced mutations in grape skin color. *Science*, 304, 982.  
799 doi:10.1126/science.1095011.
- 800 Lynch, M., 2010. Evolution of the mutation rate. *Trends Genet.*, 26, 345-352.
- 801 Marcotrigiano, M., 2010. A role for leaf epidermis in the control of leaf size and the  
802 rate and extent of mesophyll cell division. *Am. J. Bot.*, 97, 224-33.
- 803 Marcotrigiano, M., 1984. Experimentally synthesized plant chimeras 1. In vitro  
804 recovery of *Nicotiana tabacum* L. chimeras from mixed callus cultures. *Ann. Bot.*,



805 54, 503–511

806 McClintock, B., 1932. A Correlation of Ring-Shaped Chromosomes with Variegation  
807 in *Zea mays*. Proc. Natl. Acad. Sci. U.S.A., 18, 677–681.

808 McDaniel, C. N., and Poethig, R. S., 1988. Cell-lineage patterns in the shoot apical  
809 meristem of the germinating maize embryo. Planta, 175, 13–22.

810 McPheeters, K., and Skirvin, R. M., 1983. Histogenic layer manipulation in chimeral  
811 “Thornless Evergreen” trailing blackberry. Euphytica., 32, 351–360.

812 Melnyk, C.W., Meyerowitz, E.M., 2015. Plant grafting. Curr. Biol., 25, R183–8. doi:  
813 10.1016/j.cub.2015.01.029

814

815 Migliaro, D., and Crespan, M., 2014. Structural dynamics at the berry colour locus in  
816 *Vitis vinifera* L. somatic variants. Australian Journal Grape Wine Research, 20,  
817 485–495.

818 Mudge, K., Janick, J., Scofield, S., Goldschmidt, E.E., 2009. A history of grafting.  
819 Hortic. Rev. 35, 437–493. 10.1002/9780470593776.ch9

820

821 Murashige, T., and Skoog, F., 1962. A revised medium for rapid growth and bio  
822 assays with tobacco tissue cultures. Physiol. plant., 15, 473–497.

823 Nassar, N. M. A., and Bomfim, N., 2013. Synthesis of periclinal chimera in cassava.  
824 Genet. Mol. Res., 12, 610–617. doi:10.4238/2013.February.27.10.

825 Nati, P., 1674. Florentina phytologica observatio de malo *Limonia citrata-aurantia*,  
826 Florentiae vulgo la bizzaria.

827 Neuffer, M. G., 1995. Chromosome breaking sites for genetic analysis in maize.  
828 Maydica, 40, 99–116.

829 Ossowski, S., Schneeberger, K., Lucas-Lledó, J. I., Warthmann, N., Clark, R. M., Shaw,  
830 R. G., Weigel, D., and Lynch, M., 2010. The rate and molecular spectrum of  
831 spontaneous mutations in *Arabidopsis thaliana*. Science, 327, 92–94.  
832 doi:10.1126/science.1180677.

- 833 Padovan, A., Kesqei, A., Foley, W.J., and Külheim, C., 2013. Differences in gene  
834 expression within a striking phenotypic mosaic Eucalyptus tree that varies in  
835 susceptibility to herbivory. *BMC Plant Biol.* 13: 29.
- 836
- 837 Padovan, A., Patel, H.R., Chuah, A., Huttley, G.A., Krause, S.T., and Degenhardt, J.,  
838 2015. Transcriptome sequencing of two phenotypic mosaic Eucalyptus trees  
839 reveals large scale transcriptome re-modeling. *PLoS One*, 10: e0123226.
- 840
- 841 Pagnamenta, A.T., Lise, S., Harrison, V., Stewart, H., Jayawant, S., Quaghebeur, G.,  
842 Deng, A.T., Murphy, V.E., Akha, E.S., Rimmer, A., Mathieson, I., 2012. Exome  
843 sequencing can detect pathogenic mosaic mutations present at low allele  
844 frequencies. *J. Hum. Genet.*, 57, 70–72. doi:10.1038/jhg.2011.128.
- 845 Pietro N., 1674. *Florentina phytologica observatio de malo limonia citrata-avrantia*  
846 *Florentiae vvigo la bizzarria*.
- 847 Poethig, R. S., 1997. Leaf morphogenesis in flowering plants. *Plant Cell*, 9, 1077.
- 848 Poethig, R. S., and Sussex, I. M., 1985. The developmental morphology and growth  
849 dynamics of the tobacco leaf. *Planta*, 165, 158-169.
- 850 Poethig, R. S., and Szymkowiak, E. J., 1995. Clonal analysis of leaf development in  
851 maize. *Maydica*, (*Italy*).
- 852 Poethig, S., 1987. Clonal analysis of cell lineage patterns in plant development. *Am. J.*  
853 *Bot.*, 74, 581–594.
- 854 Poethig, S., 1989. Genetic mosaics and cell lineage analysis in plants. *Trends Genet.*,  
855 5, 273–277.
- 856 Popham, R. A., 1951. Principal types of vegetative shoot apex organization in  
857 vascular plants. *Ohio J. Sci.*, 51, 249–270.

- 858 Ravi, M., and Chan, S. W., 2010. Haploid plants produced by centromere-mediated  
859 genome elimination. *Nature*, 464, 615-8.
- 860 Rolland-Lagan, A.-G., Bangham, J. A., and Coen, E., 2003. Growth dynamics  
861 underlying petal shape and asymmetry. *Nature*, 422, 161–163.  
862 doi:10.1038/nature01443.
- 863 Rossant, J., and Spence, A., 1998. Chimeras and mosaics in mouse mutant analysis.  
864 *Trends Genet.*, 14, 358-63.
- 865 Sanders, H. L., Darrah, P. R., and Langdale, J. A., 2011. Sector analysis and predictive  
866 modelling reveal iterative shoot-like development in fern fronds. *Development*,  
867 138, 2925–2934. doi:10.1242/dev.065888.
- 868 Satina, S., 1944. Periclinal chimeras in *Datura* in relation to development and  
869 structure (A) of the style and stigma (B) of calyx and corolla. *Am. J. Bot.*, 31, 493-  
870 502.
- 871 Satina, S., and Blakeslee, A.F., 1943. Periclinal chimeras in *Datura* in relation to the  
872 development of the carpel. *Am. J. Bot.*, 30, 453-462.
- 873 Satina, S., and Blakeslee, A.F., 1941. Periclinal chimeras in *Datura stramonium* in  
874 relation to development of leaf and flower. *Am. J. Bot.*, 28, 862-871.
- 875 Satina, S., Blakeslee, A. F., and Avery, A. G., 1940. Demonstration of the three germ  
876 layers in the shoot apex of *Datura* by means of induced polyploidy in periclinal  
877 chimeras. *Am. J. Bot.*, 27, 73–90.
- 878 Saulsberry, A., Martin, P. R., O'Brien, T., Sieburth, L. E., and Pickett, F. B., 2002. The  
879 induced sector *Arabidopsis* apical embryonic fate map. *Development*, 129,  
880 3403–3410.
- 881 Scanlon, M. J., 2000. NARROW SHEATH1 functions from two meristematic foci  
882 during founder-cell recruitment in maize leaf development. *Development*, 127,

883 4573–4585.

884 Scanlon, M. J., and Freeling, M., 1997. Clonal sectors reveal that a specific  
885 meristematic domain is not utilized in the maize mutant narrow sheath. *Dev.*  
886 *Biol.*, 182, 52–66. doi:10.1006/dbio.1996.8452.

887 Schmidt, A., 1924. Histologische studien an phanerogamen vegetationspunkten. *Bot.*  
888 *Archiv.*, 8, 345–404.

889 Sessions, A., Yanofsky, M. F., and Weigel, D., 2000. Cell-cell signaling and movement  
890 by the floral transcription factors LEAFY and APETALA1. *Science*, 289, 779–782.

891 Shimazaki, M., Fujita, K., Kobayashi, H., and Suzuki, S., 2011. Pink-colored grape  
892 berry is the result of short insertion in intron of color regulatory gene. *PLoS*  
893 *ONE*, 6, e21308. doi:10.1371/journal.pone.0021308.

894 Sieburth, L. E., Drews, G. N., and Meyerowitz, E. M., 1998. Non-autonomy of  
895 AGAMOUS function in flower development: use of a Cre/loxP method for mosaic  
896 analysis in Arabidopsis. *Development*, 125, 4303–4312.

897 Sinha, N., and Hake, S., 1990. Mutant characters of Knotted maize leaves are  
898 determined in the innermost tissue layers. *Dev. Biol.*, 141, 203–210.

899 Skene, K., and Barlass, M., 1983. Studies on the fragmented shoot apex of grapevine  
900 IV. Separation of phenotypes in a periclinal chimera *in vitro*. *J. Ex. Bot.*, 34, 1271-  
901 1280.

902 Steeves, T. A., and Sussex, I. M., 1989. *Patterns In Plant Development*. Cambridge:  
903 Cambridge University Press.

904 Steffensen, D. M., 1968. A reconstruction of cell development in the shoot apex of  
905 maize. *Am. J. Bot.*, 55, 354–369.

906 Stegemann, S., and Bock, R., 2009. Exchange of genetic material between cells in  
907 plant tissue grafts. *Science*, 324, 649–651. doi:10.1126/science.1170397.

908 Stegemann, S., Keuthe, M., Greiner, S., and Bock, R., 2012. Horizontal transfer of  
 909 chloroplast genomes between plant species. *Proc. Natl. Acad. Sci. U.S.A.*, 109,  
 910 2434–2438. doi:10.1073/pnas.1114076109.

911 Stein, O. L., and Steffensen, D., 1959. Radiation-induced genetic markers in the study  
 912 of leaf growth in *Zea*. *Am. J. Bot.*, 46, 485-489.

913 Stewart, R.N., Burk, L.G., 1970. Independence of tissues derived from apical layers in  
 914 ontogeny of the tobacco leaf and ovary. *Am. J. Bot.* 57, 1010-16.  
 915

916 Stewart, R. N., and Dermen, H., 1975. Flexibility in ontogeny as shown by the  
 917 contribution of the shoot apical layers to leaves of periclinal chimeras. *Am. J.*  
 918 *Bot.*, 62, 935-947.

919 Stewart, R. N., and Dermen, H., 1970. Somatic genetic analysis of the apical layers of  
 920 chimeral sports in chrysanthemum by experimental production of adventitious  
 921 shoots. *Am. J. Bot.*, 57, 1061-1071.

922 Sussman, R., and Zimmer, C. 2014. *The oldest living things in the world*. University of  
 923 Chicago Press.

924 Szymkowiak, E.J., and Irish, E., 1999. Interaction between *jointless* and wild-type  
 925 tomato tissues during development of the pedicel abscission zone and the  
 926 inflorescence meristem. *Plant Cell*, 11: 159-175.

927 Szymkowiak, E. J., and Sussex, I. M., 1996. What chimeras can tell us about plant  
 928 development. *Annu. Rev. Plant Physiol. Plant Mol. Biol.*, 47, 351–376.  
 929 doi:10.1146/annurev.arplant.47.1.351.

930 Thieme, C.J., Rojas-Triana, M., Stecyk, E., Schudoma, C., Zhang, W., Yang, L.,  
 931 Miñambres, M., Walther, D., Schulze, W.X., Paz-Ares, J., Scheible, W-R., and  
 932 Kragler, F., 2015. Endogenous Arabidopsis messenger RNAs transported to  
 933 distant tissues. *Nature Plants*. 1: 15025.

- 934 This, P., Lacombe, T., Cadle-Davidson, M., and Owens, C. L., 2007. Wine grape (*Vitis*  
935 *vinifera* L.) color associates with allelic variation in the domestication gene  
936 VvmybA1. *Theor. Appl. Genet.*, 114, 723–730. doi:10.1007/s00122-006-0472-2.
- 937 Thyssen, G., Svab, Z., and Maliga, P., 2012. Cell-to-cell movement of plastids in plants.  
938 *Proc. Natl. Acad. Sci. U.S.A.*, 109, 2439–2443. doi:10.1073/pnas.1114297109.
- 939 Tilney-Bassett, R.A.E., 1991. *Plant Chimeras*. Cambridge University Press.
- 940 Turcotte, E. L., and Feaster, C.V., 1963. Haploids: High-frequency production from  
941 single-embryo seeds in a line of Pima cotton. *Science.*, 140, 1407-1408.
- 942 Turcotte, E. L., and Feaster, C.V., 1967. Semigamy in Pima cotton. *J. Hered.*, 58, 55-57.
- 943 Vezzulli, S., Leonardelli, L., Malossini, U., Stefanini, M., Velasco, R., and Moser, C.,  
944 2012. Pinot blanc and Pinot gris arose as independent somatic mutations of  
945 Pinot noir. *J. Ex. Bot.*, 63, 6359–6369. doi:10.1093/jxb/ers290.
- 946 Vincent, C.A., Carpenter, R., Coen, E.S., 1995. Cell lineage patterns and homeotic gene  
947 activity during *Antirrhinum* flower development. *Curr. Biol.*, 5, 1449-58.
- 948 Walker, A. R., Lee, E., and Robinson, S. P., 2006. Two new grape cultivars, bud sports  
949 of Cabernet Sauvignon bearing pale-coloured berries, are the result of deletion  
950 of two regulatory genes of the berry colour locus. *Plant Mol. Biol.*, 62, 623–635.  
951 doi:10.1007/s11103-006-9043-9.
- 952 Walker, A.R., Lee, E., Bogs, J., McDavid, D.A.J., Thomas, M. R., and Robinson, S.P., 2007.  
953 White grapes arose through the mutation of two similar and adjacent regulatory  
954 genes. *Plant Journal*, 49, 772–785. doi:10.1111/j.1365-3113X.2006.02997.x.
- 955 Warschefsky, E.J., Klein, L.L., Frank, M.H., Chitwood, D.H., Londo, J.P., von Wettberg,  
956 E.J.B., Miller, A.J., 2016. Rootstocks: diversity, domestication, and impacts on  
957 shoot phenotypes. *Trends in Plant Sci.*, 21, 418-37.
- 958 Weissman, T. A., Sanes, J. R., Lichtman, J. W., and Livet, J., 2011. Generation and

imaging of Brainbow mice. Cold Spring Harb. Protoc., 2011, 851–856.  
doi:10.1101/pdb.prot5632.

Weissman, T.A., Pan, Y.A., 2015. Brainbow: new resources and emerging biological  
applications for multicolor genetic labeling and analysis. Genetics, 199: 293-306.

Whitham, T. G., and Slobodchikoff, C. N., 1981. Evolution by individuals, plant-  
herbivore interactions, and mosaics of genetic variability: the adaptive  
significance of somatic mutations in plants. Oecologia, 49, 287-292.

Winkler, H., 1907. Über Pflropfbastarde und pflanliche Chimären. Ber. Deutsch. Bot.  
Gessell. 25: 568-576.

Winkler, H., 1909. Weitere Mitteilungen über Propfbastarde. Zetschr. Bot. I: 315-  
345.

Yakushiji, H., Kobayashi, S., Goto-Yamamoto, N., Tae Jeong, S., Sueta, T., Mitani, N.,  
and Azuma, A., 2006. A skin color mutation of grapevine, from black-skinned  
Pinot Noir to white-skinned Pinot Blanc, is caused by deletion of the functional  
VvmybA1 allele. Biosci. Biotechnol. Biochem., 70, 1506–1508.  
doi:10.1271/bbb.50647.

Yamaguchi, K., Komura, M., Yamaguchi, R., Imoto, S., Shimizu, E., Kasuya, S., Shibuya,  
T., Hatakeyama, S., Takahashi, N., Ikenoue, T., and Hata, K., 2015. Detection of  
APC mosaicism by next-generation sequencing in an FAP patient. J. Hum. Genet.,  
60, 227–231. doi:10.1038/jhg.2015.14.

Zhou, J., Hirata, Y., Nou, I. S., Shiotani, H., and Ito, T., 2002. Interactions between  
different genotypic tissues in citrus graft chimeras. Euphytica, 126, 355-364.



# 986 **Figures and legends**

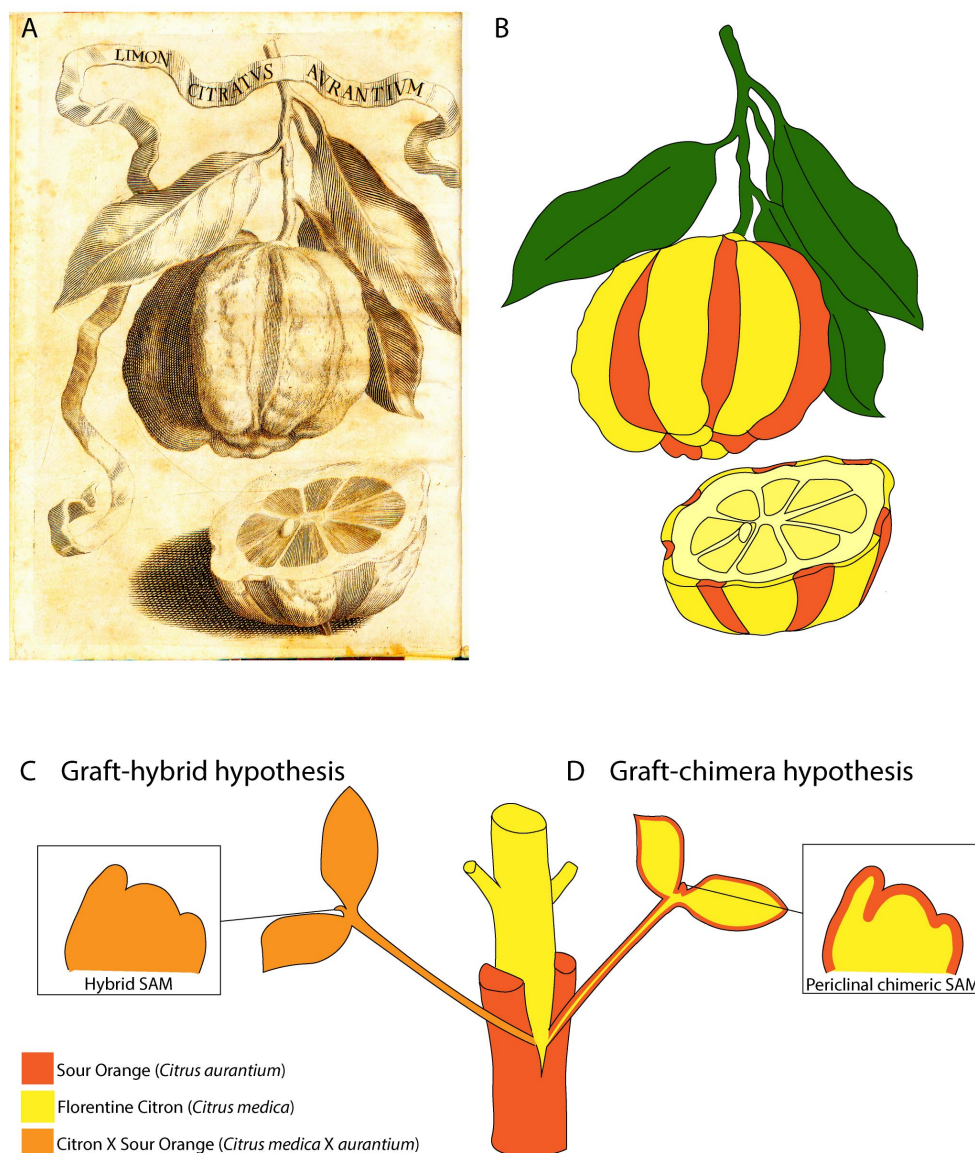

988 **Fig. 1.** Original depiction (A) and genetic basis (B-D) of the first described chimera,  
 989 The 'Bizzaria'. Pietro Nati discovered The 'Bizzaria' growing as an adventitious  
 990 shoot from the failed graft junction between Florentine Citron and Sour Orange.  
 991 Two hypotheses, the graft-hybrid (C) and the graft-chimera hypothesis (D), were  
 992 put forth to explain this unusual sport. Centuries later, Winkler (1907) and Baur  
 993 (1909) demonstrated that The 'Bizzaria' along with many other horticultural sports



994 resulted from a heterogeneous conglomeration (D) rather than asexual fusion (C) of  
995 parental cells.

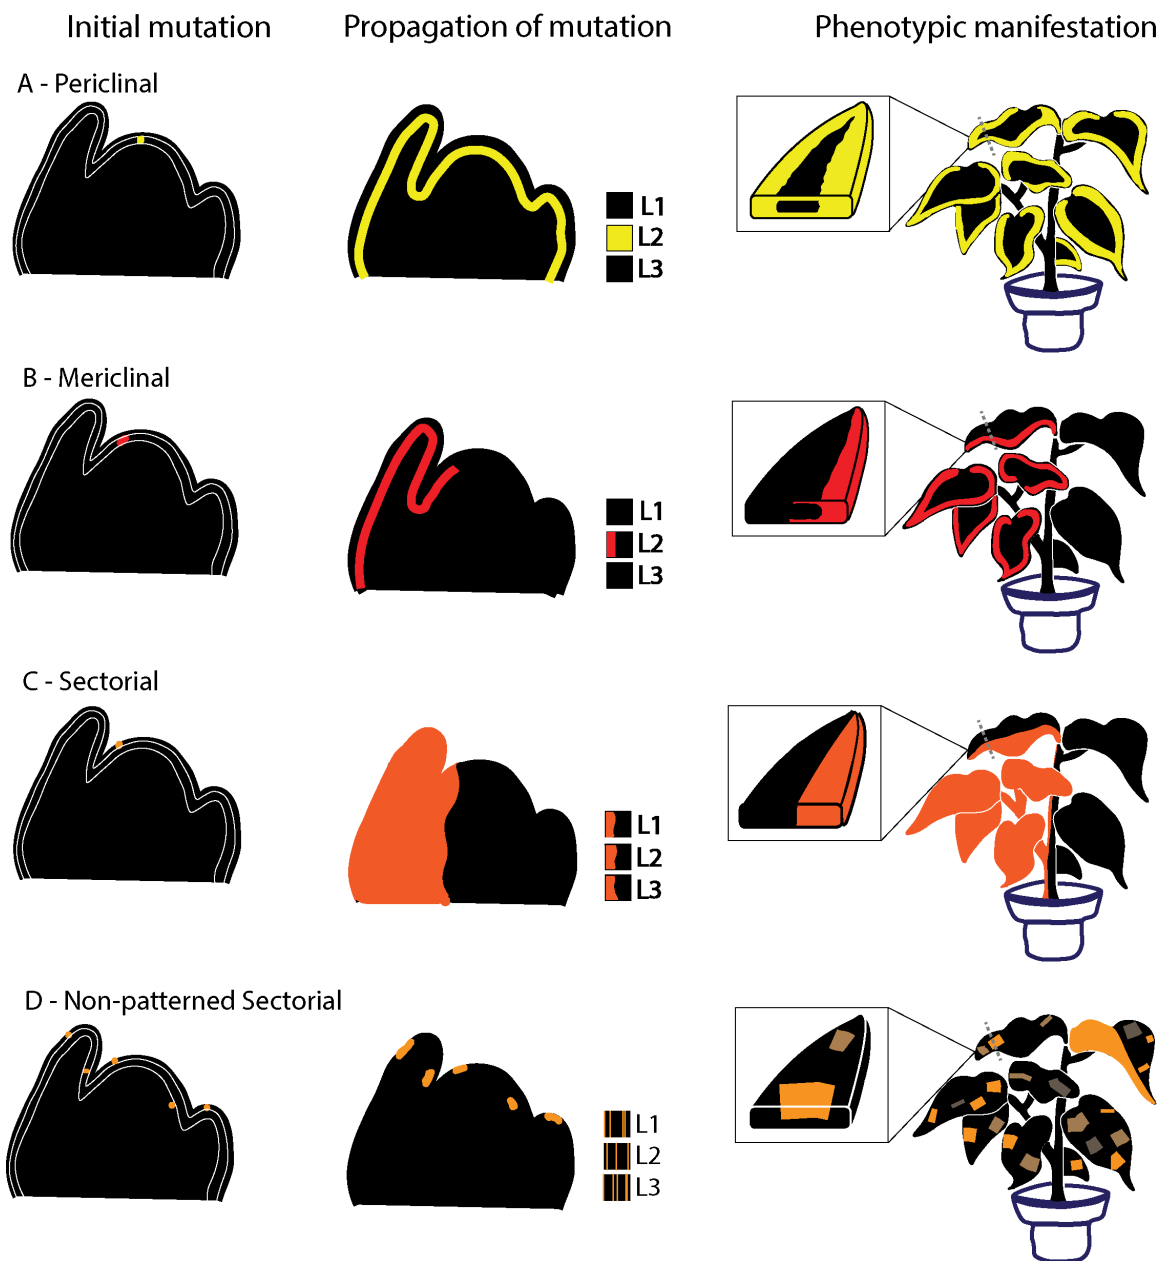

996

997

998 **Fig. 2.** Mutational basis and phenotypic manifestation of periclinal (A), mericlinal  
999 (B), and sectorial (C-D) mosaics. Periclinal (A) and mericlinal mosaics can arise  
1000 through mutations in shoot apical meristem (SAM) initial cells (shown in yellow and  
1001 red, respectively). Periclinal mosaics are formed when the mutation propagates

throughout the meristem layer, creating a uniform, genetically distinct stratum of cells (**A**). Mericlinal mosaics, on the other hand, arise from incomplete invasion of the meristem initials, creating a genetically sectorized shoot (**B**). In this example, an L2 mutation in yellow (**A**) and/or red (**B**) gives rise to mutant features along the leaf margins and wild-type features within the leaf core. Genomically unstable plants, such as individuals with active transposons, can also give rise to sectorized mosaics (**C-D**). These mosaics are often characterized as being unstable and can take the form of large sectors that traverse all layers of the shoot meristem (**C**) or have a non-patterned variegated appearance (**D**). The size and frequency of sectoring is a function of transposon (or other mutagen) activity and the rate of cell division.

# A - Single marker transgenic mosaics

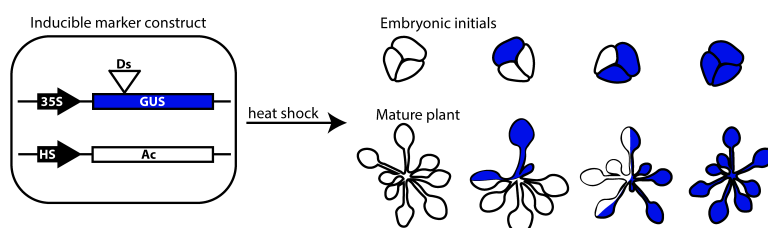

# B - Rainbow mosaics

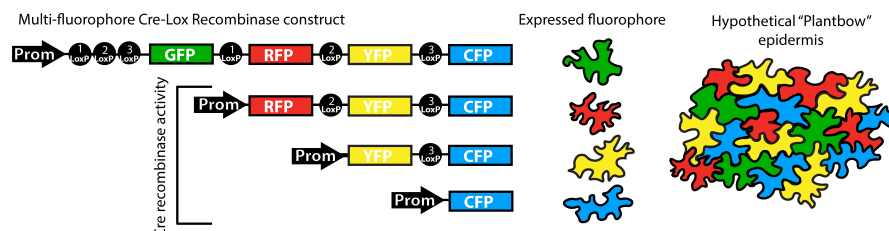

# C - CRISPR-Cas genome editing mosaics

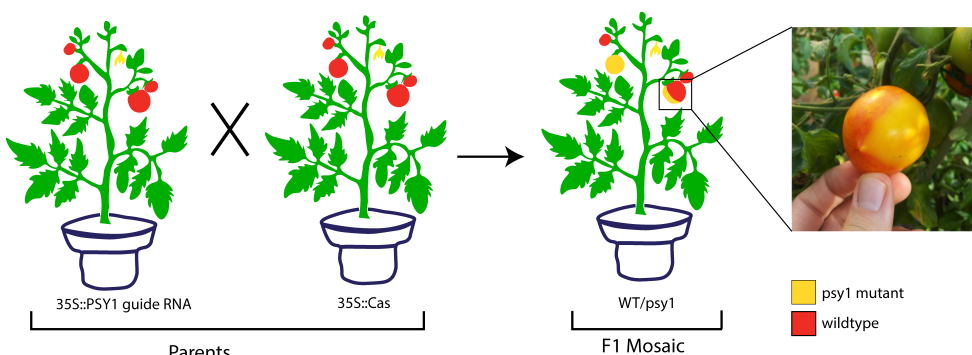

**Fig. 3.** Examples of single marker, “Rainbow”, and CRISPR-Cas transgenic mosaic systems. **(A)** Illustration of the single marker mosaic system used by Saulsberry et al. (2002) to map embryonic cell fate in Arabidopsis. In this example GUS expression is interrupted by the *Dissociator* (*Ds*) transposon, and heat shock induction of *Activator* (*Ac*) expression leads to the recovery of GUS expression through the *Ac*-promoted excision of *Ds*. The full spectrum of resulting mosaic embryonic initials as well as the mature plants that arise from each mosaic combination are illustrated from left to right with no excisions (white plant), one excision (1/3 blue), two excisions (2/3 blue), and three excisions (blue plant). **(B)** Schematic of the original Brainbow system that was used to mark developing neurons in the mouse brain

with four independently expressed fluorophores (Weissman et al., 2011). The Brainbow system relies on Cre-recombinase excision at three different LoxP sites leading to stochastic expression outputs. In this example, excision at LoxP-1 leads to the loss of GFP and the expression of RFP, whereas excision at LoxP-2 leads to the loss of both GFP and RFP and thus the expression of YFP, and the excision of LoxP-3 leads to the loss of GFP, RFP, and YFP, leaving GFP to be expressed. Since the inception of Brainbow, several modifications have been made, including the insertion of multiple fluorophore constructs, which allows for combinatorial expression outputs and greatly extends the systems ability to unambiguously mark individual cells (e.g. – RFP plus CFP = Purple Fluorescence) (Weissman and Pan, 2015). Here, we propose a hypothetical “Plantbow” system using the plant epidermis as a model, in which individual cells within any tissue layer can be fluorescently marked and tracked for the life of the cell. (C) CRISPR-Cas DNA editing technology offers a new mechanism for generating site-specific genetic mosaics. Here we illustrate an example from the Levy lab (2016, personal communication) in which F1 targeted DNA editing mosaics can be generated by crossing together guide RNA and Cas9 expressing parents. In this example, the Phytoene Synthase1 (PSY1) gene, which results in yellow fruits when it is knocked out, is targeted by the guide RNA and a picture of the mosaic red (wildtype) and yellow (psy1) tomato fruit is shown.

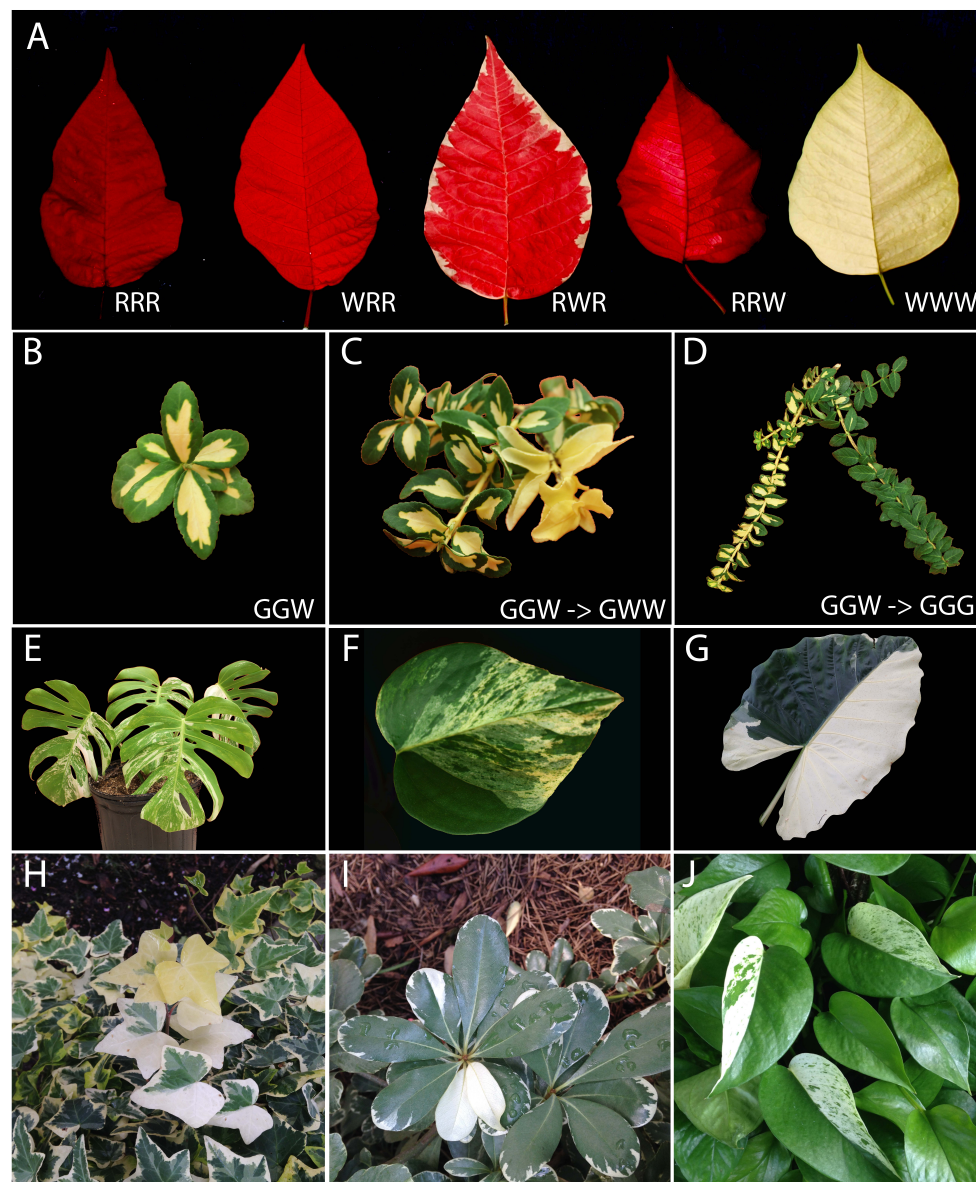

**Fig. 4.** Examples of sporting in variegated mosaics. A full spectrum of potential red (R) and white (W) periclinal arrangements in the showy foliage of *Euphorbia pulcherrima* 'Poinsettia' is shown in (A). A periclinal green-L2 white-L3 *Euonymus fortunei* 'Moon Shadow' (B) sports into an albino shoot when the L3 invades the L2 (C) and recovers into a uniform green shoot when the L2 invades the L3 (D). Active transposons in non-patterned variegated varieties create frequent G/W sectoring in *Monstera deliciosa* 'Variegata' (E), *Epipremnum aureum* 'Golden Pothos' (F), and

*Alocasia macrorrhizos* ‘Variegata’ (G). Sporting frequently occurs through incomplete invasion of SAM initials, giving rise to mericlinal sectors. Here, we show mericlinal invasions of *Hedera helix* ‘Gold Child’ sporting from GWG to GWW (H), *Pittosporum tobira* ‘Variegata’ GWG with a mericlinal sector of GWW (I), and mericlinal *Epipremnum aureum* ‘Marble Queen’ (J).

**Table 1:** Experimental and horticultural utility of different chimeric types

| Chimera/Mosaic Classification  | Experimental Utility                                                                                                                       | Horticultural Utility                                                                                                                                                | Advantages                                                                                     | Disadvantages                                             |
|--------------------------------|--------------------------------------------------------------------------------------------------------------------------------------------|----------------------------------------------------------------------------------------------------------------------------------------------------------------------|------------------------------------------------------------------------------------------------|-----------------------------------------------------------|
| Interspecies chimeras          | Investigate cell autonomous vs non-cell autonomous developmental programs, track the movement of non-cell autonomous molecular information | Can be used to physically combine desirable traits from separate species, produces horticulturally valuable cultivars (e.g. <i>Cytisus Adami</i> and the ‘Bizzaria’) | Unique opportunity to investigate developmental coordination in a highly heterogenomic context | Can be difficult to induce interspecies chimera formation |
| Induce Sector Probability Maps | Track tissue lineages and identify founder cell number                                                                                     | N/A                                                                                                                                                                  | Method is technologically straight forward and                                                 | This technique requires mutagenesis, and does not         |

|                                       |                                                                   |     |                                                                                                  |                                                                                                                                                                      |
|---------------------------------------|-------------------------------------------------------------------|-----|--------------------------------------------------------------------------------------------------|----------------------------------------------------------------------------------------------------------------------------------------------------------------------|
|                                       |                                                                   |     | can be applied to non-model species                                                              | generally provide sufficient resolution to track lineages at the cellular level                                                                                      |
| Induced Sector Genetic Mosaics        | Identify when and where a gene functions during plant development | N/A | Allows for dissection of gene function without any knowledge of gene sequence                    | Gene of interest must be linked to a traceable marker (e.g. - a chlorophyll or carotenoid biosynthesis gene), and the analysis of sectorized plants can be laborious |
| CRISPR/Cas9 Gene Editing Mosaics      | Dissect gene function in a site-specific fashion                  | N/A | Allows for fine-tuned genetic mosaic analyses                                                    | Method may be time consuming – the mosaic manifests in the F1 generation                                                                                             |
| Single Gene Transgenic Marker Systems | Track tissue lineages and identify founder cell number            | N/A | Similar to traditional probability mapping, but does not require X-ray or transposon mutagenesis | Transgenic methods must be established for the species of interest                                                                                                   |
| “Rainbow” Transgenic Marker Systems   | Produce complex tissue and organ cell lineage maps                | N/A | Enables multiple cell lineages to be tracked within a single organism                            | Transgenic methods must be established for the species of interest                                                                                                   |
| Transgenic Complementation Systems    | Dissect cell autonomous from non-cell autonomous                  | N/A | Enables elegant, cell-specific investigations                                                    | Transgenic methods must be established for the species                                                                                                               |



|                  |                                                                                                            |                                                                                          |                                                                                                               |                                                                                                                                                                   |
|------------------|------------------------------------------------------------------------------------------------------------|------------------------------------------------------------------------------------------|---------------------------------------------------------------------------------------------------------------|-------------------------------------------------------------------------------------------------------------------------------------------------------------------|
|                  | gene function in a cell specific manner, and investigate gene function of developmentally lethal mutations |                                                                                          | of gene function                                                                                              | of interest                                                                                                                                                       |
| Cytochimeras     | Cytologically track cell lineages                                                                          | N/A                                                                                      | Enables cellular level resolution of cell lineage tracking, and technique can be applied to non-model species | Analysis is extremely laborious                                                                                                                                   |
| Somatic Ejection | Link cytological features with mature plant traits; produce genetic mosaics                                | Produce double haploid breeding lines (CENH3 method only)                                | One of few methods that link cytological features with mature plant traits                                    | Can only be employed in genotypes that are amenable to somatic ejection (e.g. Semigamy mutants, ring chromosome containing genotypes, and transgenic CENH3 lines) |
| Sporting         | N/A                                                                                                        | Produces novel horticultural varieties and rarely compromises previously selected traits | Occurs spontaneously                                                                                          | Typically occurs infrequently, very little to no control over which traits are modified                                                                           |

1071
